# Supplementary material for: Arnicolide D, from the herb Centipeda minima, Is a Therapeutic Candidate against Nasopharyngeal Carcinoma
Source: MDPI journal article supplement (doi:10.3390/molecules24101908), 2019-05-17
Supplement: s1 [file s1]

## Supplementary Materials

**Table S1.** Inhibitory effects of arnicolide C on proliferation of human NPC cells.

| Cell line | IC <sub>50</sub> (μM) |      |      |
|-----------|-----------------------|------|------|
|           | 24 h                  | 48 h | 72 h |
| CNE-2     | 12.3                  | 4.64 | 3.84 |
| C666-1    | 8.52                  | 4.87 | 4.03 |
| CNE-1     | 11.42                 | 6.81 | 4.95 |
| SUNE-1    | 17.69                 | 5.75 | 3.00 |
| HONE1     | 15.05                 | 4.42 | 2.13 |

**Table S2.** Inhibitory effects of arnicolide D on proliferation of human NPC cells.

| Cell line | IC <sub>50</sub> (μM) |      |      |
|-----------|-----------------------|------|------|
|           | 24 h                  | 48 h | 72 h |
| CNE-2     | 4.26                  | 0.99 | 0.83 |
| C666-1    | 2.47                  | 0.91 | 0.96 |
| CNE-1     | 3.31                  | 2.19 | 1.76 |
| SUNE-1    | 6.22                  | 0.66 | 0.26 |
| HONE1     | 9.97                  | 0.19 | 0.02 |

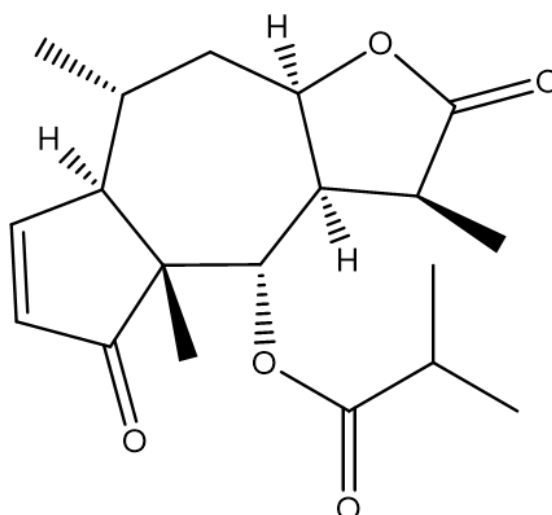

**Arnicolide C**

**Figure S1.** Chemical structure of arnicolide C.

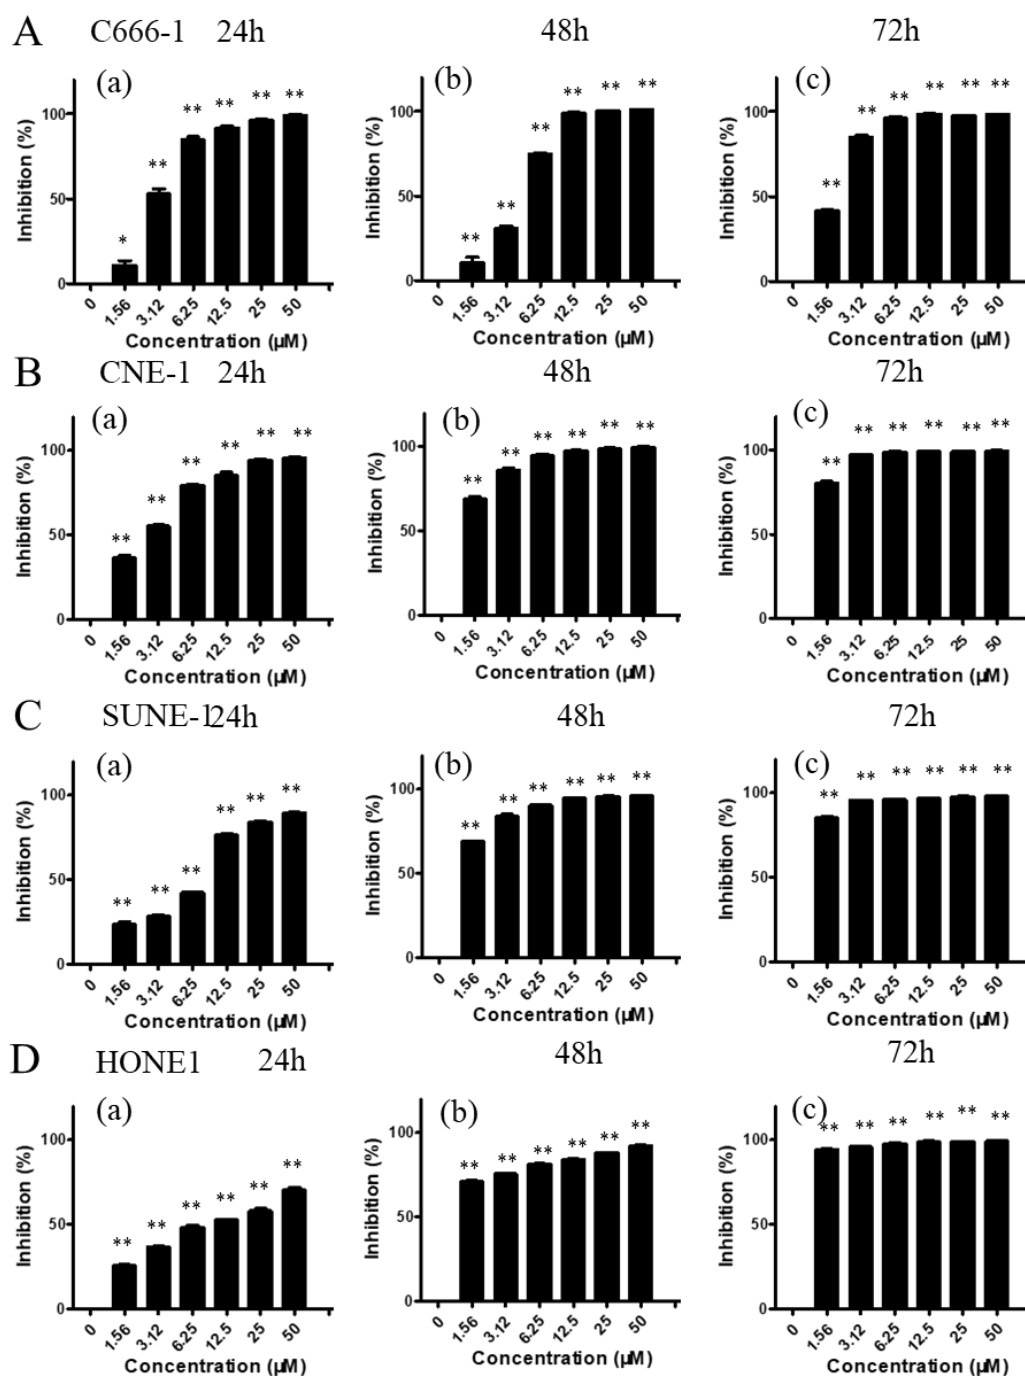

**Figure S2.** Effects of arnicolide D on proliferation of NPC cells. (A) C666-1, (B) CNE-1, (C) SUNE-1, and (D) HONE1 cells were treated with different concentrations (0–50  $\mu\text{M}$ ) of arnicolide D for 24 h, 48 h, or 72 h, after which the MTT assay was used to evaluate their anti-proliferative effects. Cells without drug treatment were used as a control. Data are shown as means  $\pm$  SD. \*  $p < 0.05$ , \*\*  $p < 0.01$ , compared with control.

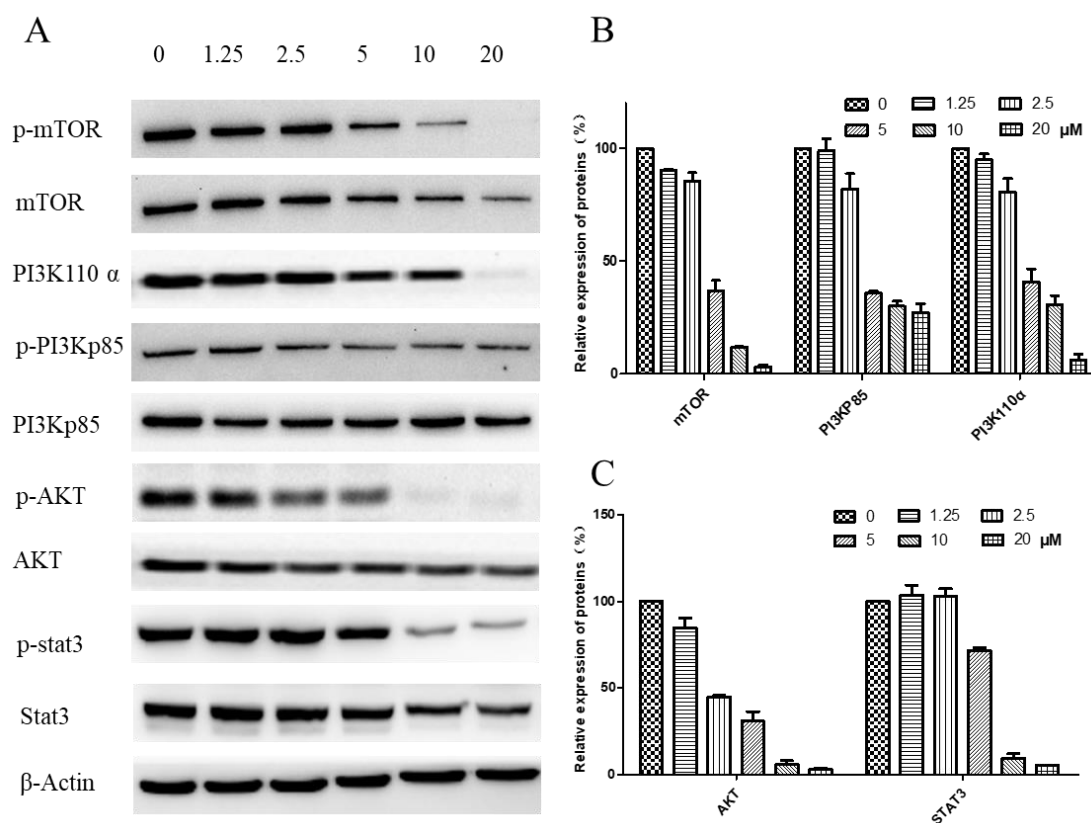

**Figure S3.** Effects of arnicolide D on PI3K/AKT pathway (24 h). CNE-2 cells were treated with arnicolide D at concentrations of 1.25–20  $\mu$ M for 24 h. Cell lysates were harvested and subjected to Western blot analysis using antibodies against mTOR and p-mTOR (Ser<sup>2481</sup>), PI3K p110  $\alpha$ , PI3K p85 and p-PI3K p85 (Tyr<sup>458</sup>), AKT and p-AKT (Ser<sup>473</sup>), STAT3 and p-STAT3 (Tyr<sup>705</sup>).  $\beta$ -actin was used as an internal control. (A) Western blot results of 24 h treatments. Bar graphs (B and C) showing the quantified relative expression of the proteins. Data are expressed as means  $\pm$  SD. \*  $p < 0.05$ , \*\*  $p < 0.01$  vs. control.
